# Supplementary material
Source: PubMed Central journal article supplement (PMC6936554)
Supplement: pnas.1915608116.sapp.pdf [file pnas.1915608116.sapp.pdf]

Supplementary information for:

Discovery and Characterization of Splice-altering Mutations in Inherited Predisposition to Cancer

\*Silvia Casadei, \*Suleyman Gulsuner, Brian H. Shirts, Jessica B. Mandell, Hannah Kortbawi,  
Ming K Lee, Yael Goldberg, Robert O'Connor, Zheng Tan, Colin C. Pritchard, Mary-Claire King,  
Tom Walsh

Corresponding author:

Mary-Claire King, [mcking@uw.edu](mailto:mcking@uw.edu)

This PDF file includes:

Tables S1 to S8

Supplementary references

**Table S1.** Proportions of pathogenic (P) and likely pathogenic (LP) mutations at intronic splice sites, as reported by ClinVar. Note that mutations at exonic splice sites are defined by ClinVar as missense (if non-synonymous) or silent (if synonymous) so not included below.

| Gene         | P+LP mutations | At intronic splice site | % splice |
|--------------|----------------|-------------------------|----------|
| <i>BRCA1</i> | 3030           | 170                     | 5.6      |
| <i>BRCA2</i> | 3481           | 160                     | 4.6      |
| <i>PALB2</i> | 507            | 43                      | 8.5      |
| <i>ATM</i>   | 1008           | 206                     | 20.4     |
| <i>CHEK2</i> | 308            | 63                      | 20.4     |
| <i>MLH1</i>  | 917            | 155                     | 16.9     |
| <i>MSH6</i>  | 735            | 48                      | 6.5      |
| <i>APC</i>   | 861            | 57                      | 6.6      |
| <i>CDH1</i>  | 212            | 36                      | 17.0     |
| <i>TP53</i>  | 486            | 56                      | 11.5     |

**Table S2. cBROCA analysis of mutations at canonical splice sites predicted to alter splicing**

| Gene   | Genotype            | Position hg19     | Exon/<br>Intron | Distance<br>to splice* | Splice<br>region | NNSPLICE<br>prediction** | MaxEnt prediction** | RT-PCR: intensity<br>of mutant to<br>normal+mutant<br>transcript from<br>diploid RNA |         | TOPO-TA:<br>proportion of<br>mutant clones<br>from diploid RNA |         | cBROCA:<br>proportion (PM) of<br>mutant transcripts<br>from mutant allele |      | cBROCA result                                        | Family |
|--------|---------------------|-------------------|-----------------|------------------------|------------------|--------------------------|---------------------|--------------------------------------------------------------------------------------|---------|----------------------------------------------------------------|---------|---------------------------------------------------------------------------|------|------------------------------------------------------|--------|
|        |                     |                   |                 |                        |                  |                          |                     | test<br>case                                                                         | control | test<br>case                                                   | control | Z-score                                                                   | PM   |                                                      |        |
| ATM    | c.901G>A; G301S     | chr11:108,115,753 | exon 7          | E 239 1                | Donor            | 0.86 > 0.00              | 7.08 > -1.69        | 0.84                                                                                 | 0.00    | 0.83                                                           | 0.03    | >10.00                                                                    | 0.97 | skip exon 7, del 239bp, codon 224 stop               | CF4576 |
| ATM    | c.2250G>A; p.K750K  | chr11:108,127,067 | exon 14         | E 126 1                | Donor            | 0.94 > 0.26              | 9.45 > 3.63         | 0.74                                                                                 | 0.00    | 0.72                                                           | 0.00    | >10.00                                                                    | 0.86 | skip exon 14, del 126bp (aa 709-750)                 | CF1019 |
| ATM    | c.2638+2T>C         | chr11:108,138,071 | intron 17       | I 21066                | Donor            | 1.00 > 0.00              | 6.62 > -1.13        | 0.57                                                                                 | 0.00    | 0.64                                                           | 0.04    | >10.00                                                                    | 0.62 | skip exon 17, del 172bp, codon 828 stop              | CF4449 |
| ATM    | c.5497-2A>C         | chr11:108,175,400 | exon 37         | I 1644 2               | Acceptor         | 0.95 > 0.00; 0.04        | 10.05 > 2.00; 2.59  | 0.28                                                                                 | 0.00    | 0.33                                                           | 0.00    | >10.00                                                                    | 0.48 | cryptic splice, del 61bp, codon 1896 stop            | CF1054 |
| ATM    | c.6976-2A>C         | chr11:108,198,370 | intron 47       | I 1418 2               | Acceptor         | 0.83 > 0.00              | 9.04 > 1.00         | 0.59                                                                                 | 0.00    | 0.48                                                           | 0.00    | >10.00                                                                    | 0.88 | skip exon 48, del 114bp (aa 2326-2363) FAT domain    | CF4502 |
| ATM    | c.7089+1_38delG38   | chr11:108,198,484 | exon 48         | I 11262                | Donor            | 1.00 > 0.00              | 10.57 > -15.17      | 0.72                                                                                 | 0.00    | 0.70                                                           | 0.00    | >10.00                                                                    | 0.94 | skip exon 48, del 114bp (aa 2326-2363) FAT domain    | CF2327 |
| ATM    | c.8418+1delGTGA     | chr11:108,214,099 | exon 57         | I 12371                | Donor            | 0.99 > 0.03              | 10.13 > 0.78        | 0.72                                                                                 | 0.00    | 0.64                                                           | 0.00    | >10.00                                                                    | 0.86 | skip exon 57, del 150bp (aa 2757-2806) kinase domain | CF2091 |
| ATM    | c.8988-1G>A         | chr11:108,236,051 | exon 63         | I 106 1                | Acceptor         | 0.87 > 0.00              | 10.46 > -1.71; 1.06 |                                                                                      |         | 0.46                                                           | 0.06    | >10.00                                                                    | 0.90 | cryptic splice, del 13bp, codon 3002 stop            | CF1396 |
| BRCA1  | c.5468-1G>A         | chr17:41,197,820  | exon 24         | I 1840 1               | Acceptor         | 0.76 > 0.00              | 9.53 > 0.78; 3.89   |                                                                                      |         | 0.48                                                           | 0.00    | >10.00                                                                    | 0.68 | cryptic splice, del 11bp, codon 1825 stop            | CF3502 |
| BRCA1  | c.4484G>T; p.R1495M | chr17:41,228,505  | exon 14         | E 127 1                | Donor            | 1.00 > 0.90              | 10.57 > 5.57        | 0.75                                                                                 | 0.00    | 0.62                                                           | 0.00    | >10.00                                                                    | 1.00 | skip exon 14, del 127bp, codon 1462 stop             | CF1048 |
| BRCA2  | c.517-2A>G          | chr13:32,900,634  | exon 7          | I 215 2                | Acceptor         | 0.98 > 0.00              | 10.00 > 2.05        | 0.76                                                                                 | 0.00    | 0.71                                                           | 0.00    | >10.00                                                                    | 0.72 | skip exon 7, del 115bp, codon 191 stop               | CF1305 |
| BRCA2  | c.7618-1G>A         | chr13:32,931,878  | exon 16         | I 1132 1               | Acceptor         | 0.69 > 0.00              | 7.11 > -1.64; 1.53  | 0.53                                                                                 | 0.00    | 0.39                                                           | 0.00    | >10.00                                                                    | 0.94 | cryptic splice, del 44bp, codon 2550 stop            | CF529  |
| BRCA2  | c.9117G>A, p.P3039P | chr13:32,954,050  | exon 23         | E 164 1                | Donor            | 0.57 > 0.00              | 4.28 > -4.94        | 0.73                                                                                 | 0.00    | 0.73                                                           | 0.00    | >10.00                                                                    | 0.92 | skip exon 23, del 164bp; codon 2988 stop             | CF976  |
| BRIP1  | c.93+1G>A           | chr17:59,938,807  | intron 2        | I 11539                | Donor            | 0.89 > 0.00              | 7.96 > -0.22        | 0.72                                                                                 | 0.00    | 0.84                                                           | 0.00    | >10.00                                                                    | 1.00 | skip exon 2, loss of first ATG                       | CF449  |
| CDH1   | c.1565+1G>A         | chr16:68,849,663  | exon 10         | I 13520                | Donor            | 1.00 > 0.00; 0.18        | 10.74 > 2.55; 2.87  |                                                                                      |         | 0.30                                                           | 0.00    | >10.00                                                                    | 0.79 | cryptic splice, ins 6bp, codon 523 stop              | CF4529 |
| CDH1   | c.1711G>A; G571S    | chr16:68,853,328  | exon 11         | E 146 1                | Donor            | 0.99 > 0.77              | 9.33 > 4.33         | 0.90                                                                                 | 0.31    | 0.86                                                           | 0.31    | >10.00                                                                    | 1.00 | skip exon 11, del 146bp, codon 538 stop              | CF1943 |
| CHEK2  | c.444+1G>A          | chr22:29,121,230  | exon 2          | I 11118                | Donor            | 0.99 > 0.00; 0.69        | 8.10 > -0.08; 7.57  |                                                                                      |         | 0.34                                                           | 0.00    | >10.00                                                                    | 0.80 | cryptic splice, ins 4bp, codon 154 stop              | CF653  |
| PALB2  | c.2835-1G>C         | chr16:23,634,452  | exon 9          | I 1877                 | Acceptor         | 0.54 > 0.00              | 8.14 > 0.07         | 0.77                                                                                 | 0.00    | 0.67                                                           | 0.00    | >10.00                                                                    | 1.00 | skip exon 9, del 162bp (aa 946-999)                  | CF612  |
| PALB2  | c.2515-1G>T         | chr16:23,640,597  | exon 6          | I 1363                 | Acceptor         | 0.96 > 0.00              | 9.47 > 0.87         | 0.65                                                                                 | 0.00    | 0.60                                                           | 0.05    | >10.00                                                                    | 0.98 | skip exon 6, del 72bp (aa 839-869)                   | CF54   |
| RAD51D | c.904-2A>T          | chr17:33,428,057  | intron 9        | I 163 2                | Acceptor         | 0.95 > 0.00; 0.96        | 8.16 > -0.20; 11.19 |                                                                                      |         | 0.45                                                           | 0.00    | >10.00                                                                    | 0.85 | cryptic splice, del 7bp, codon 327 stop              | CF4623 |

\*Genomic distance from site of mutation to nearest flanking canonical splice sites

\*\*Strength of splice given wild-type sequence > strength of splice given mutant sequence. NNSPLICE strength predictions are bounded by 0 to +1. MaxEnt strength predictions are unbounded.

**Table S3. cBROCA analysis of mutations predicted to have no effect on splicing**

| Gene  | Genotype            | Position hg19           | Exon/intron | Distance to splice | NNSPLICE prediction | MaxEnt prediction | RESCUE-ESE, HSF | ClinVar  | cBROCA result | Family        | Foot note |
|-------|---------------------|-------------------------|-------------|--------------------|---------------------|-------------------|-----------------|----------|---------------|---------------|-----------|
| ATM   | c.1009C>T, p.R337C  | chr11:108,117,798C>T    | exon 8      | E 108 57           | n                   | n                 | ESS+            | VUS      | normal        | CF4589        |           |
| ATM   | c.3963G>A, p.M1321I | chr11:108,155,170G>A    | exon 26     | E 217 31           | n                   | n                 | ESE-            | LB/VUS   | normal        | CF4574        |           |
| ATM   | c.5009C>T, p.A1670V | chr11:108,170,444C>T    | exon 34     | E 4 169            | n                   | n                 | ESS+            | VUS      | normal        | CF4471        |           |
| ATM   | c.5821G>C, p.V1941L | chr11:108,180,945G>C    | exon 39     | E 59 98            | n                   | n                 | ESE-            | VUS      | normal        | CF4566        |           |
| ATM   | c.7181C>T, p.S2394L | chr11:108,199,839C>T    | exon 49     | E 92 127           | n                   | n                 | ESE-, ESS+      | LP       | normal        | CF4660        | 1         |
| ATM   | c.8011-6T>G         | chr11:108,205,690T>G    | exon 55     | I 995 6            | 0.92 > 0.35         | 7.11 > 6.09       | n               | LB/VUS   | normal        | CF3971        |           |
| BRCA1 | c.5454C>T, p.D1818D | chr17:41,199,673C>T     | exon 18     | E 48 14            | n                   | n                 | 2ESE+, 2ESS-    | VUS      | normal        | CF4596        |           |
| BRCA1 | c.5278(-1519)T>C    | chr17:41,204,653A>G     | intron 20   | I 4416 1519        | n                   | -1.69 > 7.05      | 2ESE+, 2ESS-    | B        | normal        | CF1031        |           |
| BRCA1 | c.5207T>G, p.V1736G | chr17:41,209,139A>C     | exon 20     | E 14 71            | n                   | n                 | 3ESE+, 2ESS-    | VUS      | normal        | CF1746        | 2         |
| BRCA1 | c.5097G>A, p.R1699R | chr17:41,215,946C>T     | exon 18     | E 23 56            | n                   | n                 | 3ESE-           | ni       | normal        | CF4099        |           |
| BRCA1 | c.5074+1158C>T      | chr17:41,218,467G>A     | intron 17   | I 1158 2699        | 0.00 > 0.28         | n                 | 3ESE+           | B        | normal        | CF1830        |           |
| BRCA1 | c.4357+518delAAAG   | chr17:41,233,900delCTTT | intron 13   | I 5272 518         | n                   | 0.37 > 1.60       | 2ESE+           | ni       | normal        | CF1684        |           |
| BRCA1 | c.4185+37delITG     | chr17:41,242,923delCA   | intron 12   | I 37 8331          | n                   | n                 | 2ESE+, 2ESS-    | ni       | normal        | CF94.02       |           |
| BRCA1 | c.301+55G>A         | chr17:41,256,830C>T     | intron 6    | I 55 552           | n                   | n                 | 1ESE+, 2ESS-    | LB       | normal        | CF4590        |           |
| BRCA1 | c.190G>T, p.D67Y    | chr17:41,258,486C>A     | exon 5      | E 65 14            | n                   | n                 | 2ESE-           | B/LB/VUS | normal        | CF1684        |           |
| BRCA1 | c.135-20T>G         | chr17:41,258,570A>C     | exon 5      | I 17463 20         | 0.97 > 0.97         | 8.19 > 6.96       | n               | VUS      | normal        | CF2649        |           |
| BRCA1 | c.81-6T>C           | chr17:41,267,802A>G     | intron 2    | I 6 8232           | 0.52 > 0.40         | 7.05 > 6.16       | 1ESE-           | B/LB/VUS | normal        | CF3148        |           |
| BRCA1 | c.81T>C, p.C27C     | chr17:41,267,96A>G      | exon 3      | I 8232 6           | 0.52 > 0.41         | 7.05 > 6.86       | 4ESE-           | LB/VUS   | normal        | CF1875        |           |
| BRCA1 | c.75C>T, p.P25P     | chr17:41,276,039G>A     | exon 2      | E 94 6             | n                   | n                 | 1ESE-, 1ESS+    | B/LB     | normal        | CF729, CF2718 |           |
| BRCA2 | c.28A>G, p.T10A     | chr13:32,890,624A>G     | exon 2      | E 67 40            | n                   | n                 | 3ESE-           | VUS      | normal        | CF4651        |           |
| BRCA2 | c.128A>G, p.N43S    | chr13:32,893,274A>G     | exon 3      | E 61 189           | 0.00 > 0.71         | -8.27 > 0.48      | 4ESE-           | ni       | normal        | CF4568        |           |
| BRCA2 | c.426(-252)G>A      | chr13:32,899,986A>G     | intron 4    | I 665 252          | 0.00 > 0.88         | -2.20 > 6.65      | n               | ni       | normal        | CF4385        |           |
| BRCA2 | c.750G>A, p.V250V   | chr13:32,905,124G>A     | exon 9      | E 69 44            | n                   | n                 | 4ESE-           | B/LB     | normal        | CF4691        |           |
| BRCA2 | c.7466A>G, p.D2489G | chr13:32,930,595A>G     | exon 15     | E 31 152           | 0.00 > 0.54         | -1.54 > 6.64      | 3ESE+, 2ESS-    | VUS      | normal        | CF943         |           |
| BRCA2 | c.7559G>C, p.R2520P | chr13:32,930,688G>C     | exon 15     | E 124 59           | n                   | n                 | 1ESS+           | VUS      | normal        | CF4530        |           |
| BRCA2 | c.7820C>T, p.T2607I | chr13:32,936,674C>T     | exon 17     | E 15 157           | 0.17 > 0.22         | 5.95 > 7.10       | 2ESS+           | VUS      | normal        | CF2723        |           |
| BRCA2 | c.7879A>T, p.I2627F | chr13:32,936,733A>T     | exon 17     | E 74 98            | n                   | n                 | 3ESE-           | P        | normal        | CF852         | 3         |
| BRCA2 | c.7902G>A, p.M2634I | chr13:32,936,756G>A     | exon 17     | E 97 75            | n                   | n                 | 4ESE-, 3ESS+    | ni       | normal        | CF4320        |           |
| BRCA2 | c.8206C>T, p.L2736F | chr13:32,937,545C>T     | exon 18     | E 230 126          | 0.73 > 0.81         | 3.64 > 4.08       | 1ESE+           | VUS      | normal        | CF4562        |           |
| BRCA2 | c.8285C>G, p.P2762R | chr13:32,937,624C>G     | exon 18     | E 309 47           | n                   | n                 | 3ESE-           | VUS      | normal        | CF4520        |           |
| BRCA2 | c.8350C>T, p.R2784W | chr13:32,944,557C>T     | exon 19     | E 19 138           | 0.91 > 0.88         | n                 | 4ESE-           | VUS/LP   | normal        | CF4554        |           |
| BRCA2 | c.8359C>T, p.R2787C | chr13:32,944,566C>T     | exon 19     | E 28 129           | 0.30 > 0.39         | n                 | 3ESS+           | LB/VUS   | normal        | CF3497        |           |
| BRCA2 | c.8510G>T, p.G2837V | chr13:32,945,115G>T     | exon 20     | E 23 123           | n                   | n                 | 5ESE-           | VUS      | normal        | CF4548        |           |
| BRCA2 | c.9076C>G, p.Q3026E | chr13:32,954,009C>G     | exon 23     | E 123 42           | n                   | n                 | 1ESE-, 1ESS+    | VUS      | normal        | CF629         |           |
| BRCA2 | c.9344A>G, p.K3115R | chr13:32,968,913A>G     | exon 25     | E 88 158           | n                   | n                 | 1ESE-, 1ESS+    | VUS      | normal        | CF4089        |           |
| BRCA2 | c.9648(+127)G>A     | chr13:32,971,308G>A     | intron 26   | I 127 991          | n                   | -4.40 > 3.55      | n               | ni       | normal        | CF4282        |           |
| BRIP1 | c.2765T>C, p.L922S  | chr17:59,763,337A>G     | exon 19     | E 190 141          | n                   | n                 | 1ESE-           | ni       | normal        | CF4649        |           |
| BRIP1 | c.2309A>G, p.K797R  | chr17:59,793,414T>C     | exon 17     | E 11 103           | n                   | n                 | 2ESE-, 2ESS+    | VUS      | normal        | CF4607        |           |
| BRIP1 | c.2372A>T, p.D791V  | chr17:59,820,381T>A     | exon 16     | E 115 8            | n                   | n                 | 6ESE-           | VUS      | normal        | CF4055        |           |
| BRIP1 | c.297C>T, p.D99D    | chr17:59,934,501G>A     | exon 4      | E 92 83            | n                   | n                 | 5ESE-, 2ESS+    | LB       | normal        | CF4368        |           |

**Table S3. cBROCA analysis of mutations predicted to have no effect on splicing**

| Gene   | Genotype           | Position hg19                 | Exon/intron | Distance to splice | NNSPLICE prediction | MaxEnt prediction | RESCUE-ESE, HSF | ClinVar  | cBROCA result | Family  | Foot note |
|--------|--------------------|-------------------------------|-------------|--------------------|---------------------|-------------------|-----------------|----------|---------------|---------|-----------|
| CDH1   | c.2296-670T>A      | chr16:68,862,887T>A           | intron 14   | [680 670           | n                   | n                 | 3ESS+, 1ESS-    | ni       | normal        | CF4316  |           |
| CDH1   | c.2440-6C>G        | chr16:68,867,187C>G           | intron 15   | [3487 6            | 0.98 > 0.94         | 10.93 > 9.85      | 2ESS+           | B/LB     | normal        | CF4293  |           |
| CHEK2  | c.1130A>G, p.E377G | chr22:29,091,827T>C           | exon 11     | E [35 130          | n                   | n                 | 4ESE-, 3ESS+    | VUS      | normal        | CF4513  |           |
| CHEK2  | c.246-260del15     | chr22:29,130,450-29,130,464de | exon 2      | E [252 74          | n                   | n                 | 6ESE-           | VUS      | normal        | CF4493  |           |
| GEN1   | c.1072-185G>A      | chr2:17,955,353G>A            | intron 10   | [972 787           | n                   | n                 | 3ESS+           | ni       | normal        | CF94.02 |           |
| MLH1   | c.678-481C>T       | chr3:37,055,442C>T            | intron 8    | [2481 481          | 0.00 > 0.56         | -2.19 > 1.56      | 1ESS+           | ni       | normal        | CF4661  |           |
| PALB2  | c.2752C>T, p.P918S | chr16:23,635,412G>A           | exon 8      | E [4 83            | n                   | n                 | 4ESS+           | VUS      | normal        | CF62.08 |           |
| PALB2  | c.2587-703G>A      | chr16:23,638,421C>T           | intron 6    | [2104 703          | 0.62 > 0.64         | 3.25 > 5.87       | 1ESE-           | ni       | normal        | CF4673  |           |
| PALB2  | c.2289G>C, p.L763F | chr16:23,641,186C>G           | exon 5      | E [605 226         | 0.00 > 0.17         | 0.69 > 3.81       | 1ESS-           | LB/VUS   | normal        | CF4685  |           |
| PALB2  | c.2204C>T, p.P735L | chr16:23,641,271G>A           | exon 5      | E [520 311         | 0.21 > 0.28         | -2.64 > 3.49      | 1ESE+           | VUS      | normal        | CF4500  |           |
| PALB2  | c.1699C>T, p.H567T | chr16:23,641,776G>A           | exon 5      | E [15 816          | n                   | n                 | 1ESE-           | LB/VUS   | normal        | CF4462  |           |
| PALB2  | c.1551A>G, p.K517K | chr16:23,646,316T>C           | exon 4      | E [1340 134        | n                   | n                 | 5ESE-           | ni       | normal        | CF4667  |           |
| PALB2  | c.46A>G, p.K16E    | chr16:23,652,433T>C           | exon 1      | E [- 3             | 0.22 > 0.07         | 5.74 > 4.05; 2.84 | ESS+            | ni       | normal        | CF4151  |           |
| PTEN   | c.79+4229A>T       | chr10:89,628,534A>T           | intron 1    | [4229 25248        | n                   | n                 | 1ESE+, 2ESS-    | ni       | normal        | CF4654  |           |
| PTEN   | c.79+11548A>G      | chr10:89,638,942T>C           | intron 1    | [11548 17929       | 0.00 > 0.89         | -3.10 > 5.64      | n               | LB       | normal        | CF4361  |           |
| PTEN   | c.492+7414A>G      | chr10:89,700,422A>G           | intron 5    | [7414 11453        | 0.00 > 0.09         | -7.00 > 1.18      | 1ESE+, 1ESS-    | ni       | normal        | CF245   |           |
| RAD51D | c.904-3C>T         | chr17:33,428,059G>A           | intron 9    | [162 3             | 0.95 > 0.96         | 8.16 > 7.77       | 5ESE-, 3ESS+    | B/LB/VUS | normal        | CF604   |           |
| TP53   | c.786-60G>A        | chr17:7,577,215C>T            | intron 7    | [284 60            | 0.00 > 0.51         | -1.08 > 6.87      | 2ESE+, 3ESS-    | LB       | normal        | CF4431  |           |

Abbreviations: n, no change; ni, no information; ESE, exonic splicing enhancer; ESS, exonic splicing silencer; B, benign; LB, likely benign, VUS, variant of unknown significance; LP likely pathogenic; P, pathogenic; HSF, Human Splicing Finder (see Methods)

Footnotes:

1. Damaging effect of ATM p.S2394L on protein reported by Lin L, et al. (2015) Spontaneous ATM gene reversion in A-T iPSC to produce an isogenic cell line. Stem Cell Reports 5:1097-1108.
2. Damaging effect of BRCA1 p.V1736G on protein function reported by Lee MS et al. (2010) Comprehensive analysis of missense variations in the BRCT domain of BRCA1 by structural and functional assays. Cancer Res. 70:4880-4489, and Findlay GM et al. (2018) Accurate classification of BRCA1 variants with saturation genome editing. Nature 562:217-222.
3. Damaging effect of BRCA2 p.I2627F on protein function reported by Guidugli et al. (2013) A classification model for BRCA2 DNA binding domain missense variants based on homology-directed repair activity. Cancer Res. 73:265-275

**Table S4. cBROCA analysis of splice-junction mutations leading to multiple mutant transcripts**

| Event | Transcript                         | Trap  | Genomic position (hg19) | Exon / Intron | Distance to splice | ClinVar  | cBROCA read depths |            |                  |      | cBROCA interpretation |                                       | S4 Ref |
|-------|------------------------------------|-------|-------------------------|---------------|--------------------|----------|--------------------|------------|------------------|------|-----------------------|---------------------------------------|--------|
|       |                                    |       |                         |               |                    |          | Case               |            | Controls (N=374) |      | Case vs Control       |                                       |        |
|       |                                    |       |                         |               |                    |          | Reads              | Fraction   | mean             | s.d. | Z score               | PM Result of cBROCA analysis          |        |
| BRCA1 | c.212+1G>A (CF98)                  | 0.886 | chr17:41,258,472C>T     | intron 5      | 1 1499             | P        |                    |            |                  |      |                       |                                       | 1      |
|       | Cryptic donor exon 5 at c.191      |       |                         |               |                    |          | 516                | 0.50       | 0.12             | 0.02 | >10.00                | 0.88 del 22bp, 64 stop                |        |
|       | Skip exon 5                        |       |                         |               |                    |          | 108                | 0.10       | 0.02             | 0.01 | 6.08                  | 0.18 del 54bp, RING domain            |        |
|       | Full length                        |       |                         |               |                    |          | 406                | 0.39       | 0.85             | 0.03 | >10.00                |                                       |        |
| BRCA1 | c.594-2A>C (CF3867, CF3869)        | 0.517 | chr17:41,247,941T>G     | intron 10     | 1320 2             | B/LB/VUS |                    |            |                  |      |                       |                                       | 2      |
|       | Skip exon 10                       |       |                         |               |                    |          | 294; 271           | 0.37; 0.35 | 0.01             | 0.01 | >10.00                | 0.74 del 77bp, 201 stop               |        |
|       | Skip exons 9+10                    |       |                         |               |                    |          | 225; 253           | 0.25; 0.28 | 0.24             | 0.06 | 0.21                  | ns                                    |        |
|       | Full length                        |       |                         |               |                    |          | 295; 293           | 0.38       | 0.75             | 0.06 | 6.31                  |                                       |        |
| BRCA1 | c.4185+1insAdel21 (CF831)          |       | ni chr17:41,242,939     | intron 12     | 1 8368             | LP/P     |                    |            |                  |      |                       |                                       | 3      |
|       | Retained intron 11                 |       |                         |               |                    |          | 332                | 0.41       | 0.02             | 0.02 | >10.00                | 0.80 ins 402bp, multiple stops        |        |
|       | Skip exon 12                       |       |                         |               |                    |          | 25                 | 0.03       | 0.00             | 0.00 | >10.00                | 0.06 del 89bp, 1373 stop              |        |
|       | Skip exon 11q                      |       |                         |               |                    |          | 122                | 0.15       | 0.09             | 0.03 | 2.04                  | ns                                    |        |
|       | Full length                        |       |                         |               |                    |          | 335                | 0.41       | 0.88             | 0.02 | >10.00                |                                       |        |
| BRCA1 | c.4485-1G>A (CF4665)               | 0.480 | chr17:41,226,539C>T     | intron 14     | 1966 1             | LP/P     |                    |            |                  |      |                       |                                       |        |
|       | Cryptic acceptor exon 15 at c.4513 |       |                         |               |                    |          | 517                | 0.26       | 0.00             | 0.00 | >10.00                | 0.52 del 29bp, 1496 stop              |        |
|       | Skip exon 15                       |       |                         |               |                    |          | 283                | 0.14       | 0.00             | 0.01 | >10.00                | 0.28 del 191bp, 1059 stop             |        |
|       | Full length                        |       |                         |               |                    |          | 1177               | 0.60       | 1.00             | 0.01 | >10.00                |                                       |        |
| BRCA1 | c.5277+1G>A (CF1012)               | 0.959 | chr17:41,209,068C>T     | intron 20     | 1 5934             | P        |                    |            |                  |      |                       |                                       | 4      |
|       | Cryptic splice at c.5277+88        |       |                         |               |                    |          | 380                | 0.24       | 0.00             | 0.02 | 9.54                  | 0.48 run-on from exon 20, 1767 stop   |        |
|       | Skip exon 20                       |       |                         |               |                    |          | 114                | 0.07       | 0.00             | 0.01 | 9.40                  | 0.14 del 84bp, BRCT domain            |        |
|       | Full length                        |       |                         |               |                    |          | 1100               | 0.69       | 1.00             | 0.03 | 9.53                  |                                       |        |
| BRCA2 | c.7007G>C, p.R2336P (CF498)        | 0.960 | chr13:32,921,033G>C     | exon 13       | E 70 1             | P        |                    |            |                  |      |                       |                                       | 5      |
|       | Skip exons 12-13                   |       |                         |               |                    |          | 380                | 0.19       | 0.00             | 0.00 | >10.00                | 0.38 del 166bp, 2311 stop             |        |
|       | Skip exon 13                       |       |                         |               |                    |          | 222                | 0.11       | 0.00             | 0.00 | >10.00                | 0.22 del 70bp, 2343 stop              |        |
|       | Full length                        |       |                         |               |                    |          | 1414               | 0.70       | 1.00             | 0.00 | >10.00                |                                       |        |
| BRCA2 | c.7007+1G>C (CF4704)               | 0.940 | chr13:32,921,034G>C     | intron 13     | 1 7965             | P        |                    |            |                  |      |                       |                                       |        |
|       | Skip exons 12-13                   |       |                         |               |                    |          | 318                | 0.25       | 0.00             | 0.00 | >10.00                | 0.50 del 166bp, 2311 stop             |        |
|       | Skip exon 13                       |       |                         |               |                    |          | 139                | 0.11       | 0.00             | 0.00 | >10.00                | 0.22 del 70bp, 2343 stop              |        |
|       | Full length                        |       |                         |               |                    |          | 829                | 0.64       | 1.00             | 0.00 | >10.00                |                                       |        |
| BRCA2 | c.7976G>A, p.R2659K (CF691)        | 0.997 | chr13:32,936,830G>A     | exon 17       | E 171 1            | P        |                    |            |                  |      |                       |                                       | 6      |
|       | Skip exon 17                       |       |                         |               |                    |          | 889                | 0.42       | 0.00             | 0.00 | >10.00                | 0.84 del 171bp, DNA binding domain    |        |
|       | Skip exons 17+18                   |       |                         |               |                    |          | 223                | 0.11       | 0.02             | 0.01 | >10.00                | 0.20 del 526bp, 2645 stop             |        |
|       | Full length                        |       |                         |               |                    |          | 996                | 0.47       | 0.98             | 0.01 | >10.00                |                                       |        |
| BRCA2 | c.7976+2C>G (CF4126)               | 0.953 | chr13:32,936,832C>G     | intron 17     | 2 484              | LP/P     |                    |            |                  |      |                       |                                       |        |
|       | Skip exon 17                       |       |                         |               |                    |          | 467                | 0.32       | 0.00             | 0.00 | >10.00                | 0.64 del 171bp, DNA binding domain    |        |
|       | Skip exons 17+18                   |       |                         |               |                    |          | 196                | 0.14       | 0.02             | 0.01 | >10.00                | 0.26 del 526bp, 2645 stop             |        |
|       | Full length                        |       |                         |               |                    |          | 781                | 0.54       | 0.98             | 0.01 | >10.00                |                                       |        |
| ATM   | c.-30-1G>T (CF3950)                |       | chr11:108,098,321G>T    | intron 2      | 4408 1             | LP       |                    |            |                  |      |                       |                                       | 7      |
|       | Cryptic acceptor exon 2 at c.-27   |       |                         |               |                    |          | 450                | 0.30       | 0.00             | 0.00 | >10.00                | 0.60 del 4bp in 5'UTR                 |        |
|       | Skip exon 2                        |       |                         |               |                    |          | 146                | 0.10       | 0.00             | 0.00 | >10.00                | 0.20 del aa 1-93, including start ATG |        |
|       | Full length                        |       |                         |               |                    |          | 880                | 0.60       | 1.00             | 0.00 | >10.00                |                                       |        |

**Table S4. cBROCA analysis of splice-junction mutations leading to multiple mutant transcripts**

| Event                              | Transcript                        | Trap | Genomic position (hg19) | Exon / Intron | Distance to splice | ClinVar | cBROCA read depths |          |                  |      | cBROCA interpretation |                                          | S4 Ref |
|------------------------------------|-----------------------------------|------|-------------------------|---------------|--------------------|---------|--------------------|----------|------------------|------|-----------------------|------------------------------------------|--------|
|                                    |                                   |      |                         |               |                    |         | Case               |          | Controls (N=374) |      | Case vs Control       |                                          |        |
|                                    |                                   |      |                         |               |                    |         | Reads              | Fraction | mean             | s.d. | Z score               | PM Result of cBROCA analysis             |        |
| ATM c.3154-1G>A (CF568)            | Skip exons 21+22                  |      | chr11:108,143,448G>A    | intron 21     | 114 1              | LP      | 506                | 0.20     | 0.00             | 0.00 | >10.00                | 0.40 del 207bp, 1026 stop                |        |
|                                    | Cryptic acceptor at c.3154-15     |      |                         |               |                    |         | 468                | 0.18     | 0.00             | 0.00 | >10.00                | 0.36 ins 14bp, 1068 stop                 |        |
|                                    | Skip exon 22                      |      |                         |               |                    |         | 291                | 0.11     | 0.00             | 0.00 | >10.00                | 0.22 del 131bp, 1068 stop                |        |
|                                    | Full length                       |      |                         |               |                    |         | 1296               | 0.51     | 1.00             | 0.00 | >10.00                |                                          |        |
| ATM c.5674+1G>T (CF1395)           | Retained intron 36                |      | chr11:108,175,580G>T    | intron 37     | 3044 1             | new     | 1476               | 0.60     | 0.04             | 0.02 | >10.00                | 0.94 degenerate transcript               |        |
|                                    | Skip exon 37                      |      |                         |               |                    |         | 57                 | 0.02     | 0.00             | 0.00 | >10.00                | 0.04 del 178bp, 1857 stop                |        |
|                                    | Skip exons 37+38                  |      |                         |               |                    |         | 14                 | 0.01     | 0.00             | 0.00 | >10.00                | 0.02 del 266bp, 1840 stop                |        |
|                                    | Full length                       |      |                         |               |                    |         | 913                | 0.37     | 0.96             | 0.02 | >10.00                |                                          |        |
| ATM c.7629+2T>C (CF3442)           | Skip exon 51                      |      | chr11:108,202,286T>C    | intron 51     | 2 320              | LP      | 626                | 0.19     | 0.00             | 0.00 | >10.00                | 0.38 del 114bp (aa 2506-2543) FAT domain |        |
|                                    | Cryptic donor at c.7629+5         |      |                         |               |                    |         | 154                | 0.05     | 0.00             | 0.00 | >10.00                | 0.10 ins 4bp, 2548 stop                  |        |
|                                    | Full length                       |      |                         |               |                    |         | 2477               | 0.76     | 1.00             | 0.00 | >10.00                |                                          |        |
| BARD1 c.159-1G>T (CF5058)          | Skip exon 2                       |      | chr2:215,661,842C>A     | intron 2      | 12294 1            | LP      | 235                | 0.21     | 0.00             | 0.00 | >10.00                | 0.42 del 57bp (aa 53-72) RING domain     |        |
|                                    | Skip exons 2+3                    |      |                         |               |                    |         | 201                | 0.18     | 0.00             | 0.01 | >10.00                | 0.36 del 206bp, 53 stop                  |        |
|                                    | Full length                       |      |                         |               |                    |         | 708                | 0.62     | 1.00             | 0.01 | >10.00                |                                          |        |
| BRIP1 c.93+1G>A (CF449)            | Skip exon 2_delATG                |      | chr17:59,938,807C>T     | intron 2      | 1 1539             | LP      | 1244               | 0.57     | 0.01             | 0.01 | >10.00                | 1.00 loss of first ATG                   |        |
|                                    | Alternate splice at c.-27         |      |                         |               |                    |         | 299                | 0.14     | 0.33             | 0.03 | 6.68                  |                                          |        |
|                                    | Full length                       |      |                         |               |                    |         | 627                | 0.29     | 0.66             | 0.03 | >10.00                |                                          |        |
| CDH1 c.1565+1G>A (CF4529)          | Cryptic donor at c.1565+7         |      | chr16:68,849,663G>A     | intron 10     | 1 3520             | P       | 127                | 0.30     | 0.00             | 0.00 | >10.00                | 0.60 ins 6bp, 523 stop                   |        |
|                                    | Retained intron 10                |      |                         |               |                    |         | 40                 | 0.10     | 0.01             | 0.01 | >10.00                | 0.19 multiple stops                      |        |
|                                    | Full length                       |      |                         |               |                    |         | 253                | 0.60     | 0.91             | 0.04 | >10.00                |                                          |        |
| PALB2 c.2835-1G>C (CF612)          | Skip exon 9                       |      | chr16:23,634,452C>G     | intron 9      | 1 878              | P       | 1012               | 0.50     | 0.00             | 0.01 | >10.00                | 1.00 del 162bp (aa 945-999) WD domains   |        |
|                                    | Cryptic acceptor exon 9 at c.2864 |      |                         |               |                    |         | 97                 | 0.05     | 0.00             | 0.00 | >10.00                | 0.10 del 30bp (aa 945-955) WD domain     |        |
|                                    | Full length                       |      |                         |               |                    |         | 897                | 0.45     | 1.00             | 0.01 | >10.00                |                                          |        |
| PALB2 c.3113G>A, p.W1038X (CF1419) | Cryptic donor exon 10 at c.3083   |      | chr16:23,632,683C>T     | exon 10       | E 117 1            | LP/P    | 402                | 0.20     | 0.00             | 0.00 | >10.00                | 0.40 del 31bp, 1030 stop                 |        |
|                                    | Skip exon 10                      |      |                         |               |                    |         | 353                | 0.18     | 0.00             | 0.00 | >10.00                | 0.36 del 117bp, WD domain                |        |
|                                    | Skip exons 9+10                   |      |                         |               |                    |         | 113                | 0.06     | 0.00             | 0.00 | >10.00                | 0.12                                     |        |
|                                    | Full length                       |      |                         |               |                    |         | 1125               | 0.56     | 1.00             | 0.00 | >10.00                |                                          |        |

**Table S5. cBROCA analysis of intronic mutations**

| Event | Transcript                                     | Genomic position (hg19) | Distance to intron splice | Splice region | NNSPLICE prediction | MaxEnt prediction | HSF prediction     | ClinVar prediction | cBROCA read depths |          |                  |      | cBROCA interpretation |                                             | S5 Ref |   |
|-------|------------------------------------------------|-------------------------|---------------------------|---------------|---------------------|-------------------|--------------------|--------------------|--------------------|----------|------------------|------|-----------------------|---------------------------------------------|--------|---|
|       |                                                |                         |                           |               |                     |                   |                    |                    | Case               |          | Controls (N=374) |      | Z score               | PM Result                                   |        |   |
|       |                                                |                         |                           |               |                     |                   |                    |                    | Reads              | Fraction | mean             | s.d. |                       |                                             |        |   |
| BRCA1 | c.4986+3G>C<br>CF4616                          | chr17:41,222,942C>G     | 16                        | {3 3230       | Donor               | 0.66 > 0.00; 0.35 | 5.91 > -2.37; 2.16 | -                  | LP/P               |          |                  |      |                       |                                             |        | 1 |
|       | Cryptic acceptor at c.4986+66                  |                         |                           |               |                     |                   |                    |                    | 742                | 0.22     | 0.00             | 0.00 | >10.00                | 0.44 ins 65bp, 1676 stop                    |        |   |
|       | Skip exon 17                                   |                         |                           |               |                     |                   |                    |                    | 187                | 0.05     | 0.02             | 0.03 | ns                    | 0.08 del 88bp, 1672 stop; not significant   |        |   |
|       | Full length                                    |                         |                           |               |                     |                   |                    |                    | 2486               | 0.73     | 0.97             | 0.03 | >10.00                |                                             |        |   |
| BRCA1 | c.5194-12G>A<br>CF3308                         | chr17:41,209,164C>T     | 19                        | {6 86 12      | Acceptor            | 0.73 > 0.67       | 9.36 > 4.34        | -                  | P                  |          |                  |      |                       |                                             |        | 2 |
|       | Retain intron 19                               |                         |                           |               |                     |                   |                    |                    | 86                 | 0.15     | 0.03             | 0.02 | 5.33                  | 0.27 degenerate transcript, multiple stops  |        |   |
|       | Skip exon 20                                   |                         |                           |               |                     |                   |                    |                    | 6                  | 0.01     | 0.00             | 0.00 | ns                    | 0.02 del 84bp, BRCT domain; not significant |        |   |
|       | Full length                                    |                         |                           |               |                     |                   |                    |                    | 480                | 0.84     | 0.97             | 0.02 | 5.81                  |                                             |        |   |
| BRCA1 | c.5406+4delAGTA<br>CF4672                      | chr17:41,201,131del4    | 22                        | {4 1411       | Donor               | 0.98 > 0.00       | 9.49 > -5.81       | -                  | new                |          |                  |      |                       |                                             |        |   |
|       | Skip exon 22                                   |                         |                           |               |                     |                   |                    |                    | 24                 | 0.53     | 0.01             | 0.00 | >10.00                | 1.00 del 74bp, 1804 stop                    |        |   |
|       | Full length                                    |                         |                           |               |                     |                   |                    |                    | 21                 | 0.47     | 0.99             | 0.00 | >10.00                |                                             |        |   |
| BRCA2 | c.7007+5G>A<br>CF4629                          | chr13:32,921,038G>A     | 13                        | {5 7961       | Donor               | 0.99 > 0.51       | 10.53 > 5.48       | -                  | VUS                |          |                  |      |                       |                                             |        |   |
|       | Skip exons 12-13                               |                         |                           |               |                     |                   |                    |                    | 558                | 0.23     | 0.00             | 0.00 | >10.00                | 0.46 del 166bp, 2311 stop                   |        |   |
|       | Skip exon 13                                   |                         |                           |               |                     |                   |                    |                    | 238                | 0.10     | 0.00             | 0.00 | >10.00                | 0.20 del 70bp, 2343 stop                    |        |   |
|       | Full length                                    |                         |                           |               |                     |                   |                    |                    | 1580               | 0.66     | 1.00             | 0.00 | >10.00                |                                             |        |   |
| BRCA2 | c.8331+3A>C<br>CF4463                          | chr13:32,937,673A>C     | 18                        | {3 6866       | Donor               | 0.96 > 0.07       | 8.88 > 3.77        | -                  | VUS                |          |                  |      |                       |                                             |        |   |
|       | Retain intron 18                               |                         |                           |               |                     |                   |                    |                    | 776                | 0.19     | 0.02             | 0.02 | >10.00                | 0.36 degenerate transcript, multiple stops  |        |   |
|       | Skip exon 18                                   |                         |                           |               |                     |                   |                    |                    | 359                | 0.09     | 0.01             | 0.01 | >10.00                | 0.17 del 355bp, 2702 stop                   |        |   |
|       | Full length                                    |                         |                           |               |                     |                   |                    |                    | 2921               | 0.72     | 0.97             | 0.02 | >10.00                |                                             |        |   |
| APC   | c.532-1000delGT<br>CF4118                      | chr5:112,115,487delGT   | 5                         | {4053 1000    | Intronic silencer   | -                 | -                  | 2ESE+, 3ESS-       | new                |          |                  |      |                       |                                             |        |   |
|       | Exonification of chr5:112,115,381-112,115,547  |                         |                           |               |                     |                   |                    |                    | 127                | 0.44     | 0.00             | 0.00 | >10.00                | 0.88 new exon, ins 165bp, 199 stop          |        |   |
|       | Normal length                                  |                         |                           |               |                     |                   |                    |                    | 159                | 0.56     | 1.00             | 0.00 | >10.00                |                                             |        |   |
| ATM   | c.5007-3T>A<br>CF4620                          | chr11:108,170,438T>A    | 33                        | {2329 3       | Acceptor            | -                 | 2.46 > 0.87        | -                  | VUS                |          |                  |      |                       |                                             |        |   |
|       | Retained intron 33                             |                         |                           |               |                     |                   |                    |                    | 422                | 0.36     | 0.05             | 0.01 | >10.00                | 0.67 degenerate transcript, multiple stops  |        |   |
|       | Cryptic acceptor at c.5006-16                  |                         |                           |               |                     |                   |                    |                    | 94                 | 0.08     | 0.00             | 0.00 | >10.00                | 0.16 ins 15bp                               |        |   |
|       | Full length                                    |                         |                           |               |                     |                   |                    |                    | 657                | 0.56     | 1.00             | 0.00 | >10.00                |                                             |        |   |
| ATM   | c.8787-13G>T<br>CF4705                         | chr11:108,225,525T>G    | 61                        | {918 13       | Acceptor            | 0.81 > 0.36; 1.00 | 8.29 > 6.10; 10.87 | -                  | new                |          |                  |      |                       |                                             |        |   |
|       | Skip exon 61                                   |                         |                           |               |                     |                   |                    |                    | 507                | 0.17     | 0.00             | 0.00 | >10.00                | 0.34 del 64bp, 2941 stop                    |        |   |
|       | Exonification of chr11:108,225,645-108,225,825 |                         |                           |               |                     |                   |                    |                    | 314                | 0.11     | 0.00             | 0.00 | >10.00                | 0.22 new exon, ins 181bp, 2969 stop         |        |   |
|       | Full length                                    |                         |                           |               |                     |                   |                    |                    | 2155               | 0.72     | 1.00             | 0.00 | >10.00                |                                             |        |   |
| BARD1 | c.1569-12T>G<br>CF4718                         | chr2:215,617,291A>C     | 6                         | {14915 12     | Acceptor            | 0.40 > 0.08; 0.22 | 5.42 > 3.62; 4.55  | -                  | VUS                |          |                  |      |                       |                                             |        |   |
|       | Skip exon 7                                    |                         |                           |               |                     |                   |                    |                    | 506                | 0.10     | 0.01             | 0.01 | 8.68                  | 0.19 del 109bp, 524 stop                    |        |   |
|       | Cryptic acceptor exon 7 at c.1603              |                         |                           |               |                     |                   |                    |                    | 342                | 0.07     | 0.01             | 0.01 | 5.58                  | 0.13 del 35bp, 524 stop                     |        |   |
|       | Full length                                    |                         |                           |               |                     |                   |                    |                    | 4024               | 0.83     | 0.98             | 0.01 | >10.00                |                                             |        |   |
| CHEK2 | c.320-5T>A<br>CF4428, CF4436                   | chr22:29,121,360A>T     | 2                         | {9031 5       | Acceptor            | 0.93 > 0.63       | 7.66 > 5.99        | -                  | B/LB/VUS           |          |                  |      |                       |                                             |        | 3 |
|       | Skip exons 3+4                                 |                         |                           |               |                     |                   |                    |                    | 16; 31             | 0.03     | 0.00             | 0.00 | >10.00                | 0.06 del 273bp, 91 aa, FHA domain           |        |   |
|       | Skip exons 3+4+5                               |                         |                           |               |                     |                   |                    |                    | 15; 45             | 0.03     | 0.00             | 0.00 | >10.00                | 0.06 del 364bp, 113 stop                    |        |   |
|       | Full length                                    |                         |                           |               |                     |                   |                    |                    | 428; 1039          | 0.93     | 1.00             | 0.00 | >10.00                |                                             |        |   |
| CHEK2 | c.592+3A>T<br>CF4447                           | chr22:29,120,962T>A     | 4                         | {3 5489       | Donor               | 0.78 > 0.26       | 8.49 > 1.81        | -                  | VUS/LP             |          |                  |      |                       |                                             |        | 3 |



**Table S5. cBROCA analysis of intronic mutations**

| Event  | Transcript                                    | Genomic position (hg19) | Distance to intron splice | Splice region | NNSPLICE prediction | MaxEnt prediction | HSF prediction | ClinVar prediction | cBROCA read depths |            |                  |      | cBROCA interpretation |                                              | S5 Ref |
|--------|-----------------------------------------------|-------------------------|---------------------------|---------------|---------------------|-------------------|----------------|--------------------|--------------------|------------|------------------|------|-----------------------|----------------------------------------------|--------|
|        |                                               |                         |                           |               |                     |                   |                |                    | Case               |            | Controls (N=374) |      | Z score               | PM Result                                    |        |
|        |                                               |                         |                           |               |                     |                   |                |                    | Reads              | Fraction   | mean             | s.d. |                       |                                              |        |
|        | Skip exon 4                                   |                         |                           |               |                     |                   |                |                    | 227                | 0.16       | 0.00             | 0.00 | >10.00                | 0.32 del 148bp, 155 stop                     |        |
|        | Skip exons 4+5                                |                         |                           |               |                     |                   |                |                    | 206                | 0.15       | 0.01             | 0.02 | 8.19                  | 0.29 del 239bp, 164 stop                     |        |
|        | Skip exon 5                                   |                         |                           |               |                     |                   |                |                    | 201                | 0.14       | 0.17             | 0.10 | ns                    | del 91bp, 204 stop, not significant          |        |
|        | Full length                                   |                         |                           |               |                     |                   |                |                    | 779                | 0.55       | 0.81             | 0.12 | 2.23                  |                                              |        |
| CHEK2  | c.846+4delAGTA CF3575                         | chr22:29,105,987del4    | 7                         | 4 6436        | Donor               | 0.99 > 0.00       | 8.31 > 4.42    | -                  | VUS                |            |                  |      |                       |                                              |        |
|        | Skip exons 7+8                                |                         |                           |               |                     |                   |                |                    | 2034               | 0.48       | 0.00             | 0.01 | >10.00                | 0.96 del 54bp, 18aa, kinase domain           |        |
|        | Skip exon 7                                   |                         |                           |               |                     |                   |                |                    | 387                | 0.09       | 0.00             | 0.00 | >10.00                | 0.18 del 116bp, 272 stop                     |        |
|        | Skip exon 8                                   |                         |                           |               |                     |                   |                |                    | 756                | 0.25       | 0.45             | 0.17 | 0.81                  | ns                                           |        |
|        | Full length                                   |                         |                           |               |                     |                   |                |                    | 526                | 0.17       | 0.55             | 0.17 | 0.78                  |                                              |        |
| MLH1   | c.1732-264A>T CF4679                          | chr3:37,088,746A>T      | 15                        | 4924 264      | Cryptic donor       | 0.00 > 0.99       | 1.54 > 9.72    | -                  | new                |            |                  |      |                       |                                              |        |
|        | Exonification of chr3:37,088,604-37,088,744   |                         |                           |               |                     |                   |                |                    | 692                | 0.22       | 0.00             | 0.00 | >10.00                | 0.44 new exon, ins 141bp, 587 stop           |        |
|        | Exonification of chr3:37,088,660-37,088,744   |                         |                           |               |                     |                   |                |                    | 318                | 0.10       | 0.00             | 0.00 | >10.00                | 0.20 new exon, ins 85bp, 581 stop            |        |
|        | Full length                                   |                         |                           |               |                     |                   |                |                    | 2085               | 0.67       | 1.00             | 0.00 | >10.00                |                                              |        |
| MSH2   | c.2635-24A>G CF4659                           | chr2:47,709,894A>G      | 15                        | 1884 24       | Branch point        | -                 | -              | BP-; 4ESS+         | new                |            |                  |      |                       |                                              |        |
|        | Retained intron 15                            |                         |                           |               |                     |                   |                |                    | 811                | 0.23       | 0.05             | 0.04 | 5.04                  | 0.41 degenerate transcript, multiple stops   |        |
|        | Alternate 3'UTR at chr2:47,739,442-47,739,573 |                         |                           |               |                     |                   |                |                    | 176                | 0.05       | 0.00             | 0.00 | >10.00                | 0.10 ins 132bp, 922 stop                     |        |
|        | Full length                                   |                         |                           |               |                     |                   |                |                    | 2539               | 0.72       | 0.95             | 0.04 | 6.37                  |                                              |        |
| PTEN   | c.210-7del5 CF66.02,.03                       | chr10:89,690,796del5    | 3                         | 5492 7        |                     |                   |                |                    |                    |            |                  |      |                       |                                              | 6      |
|        | Skip exon 4                                   |                         |                           |               |                     |                   |                |                    | 194; 253           | 0.02; 0.02 | 0.00             | 0.00 | >10.00                | 0.04 del 44bp, 76 stop                       |        |
|        | Full length                                   |                         |                           |               |                     |                   |                |                    | 9951; 13843        | 0.98; 0.98 | 1.00             | 0.00 | >10.00                |                                              |        |
| RAD51C | c.904+5G>T CF2522                             | chr17:56,798,178G>T     | 6                         | 5 3223        | Donor               | 0.91 > 0.02       | 5.56 > -0.93   | -                  | LP                 |            |                  |      |                       |                                              | 4      |
|        | Skip exon 6                                   |                         |                           |               |                     |                   |                |                    | 2271               | 0.32       | 0.01             | 0.00 | >10.00                | 0.63 del 67bp, 291 stop                      |        |
|        | Skip exons 6+7                                |                         |                           |               |                     |                   |                |                    | 690                | 0.10       | 0.00             | 0.00 | >10.00                | 0.20 del 128bp, 304 stop                     |        |
|        | Skip exons 6+7+8                              |                         |                           |               |                     |                   |                |                    | 363                | 0.05       | 0.00             | 0.00 | >10.00                | 0.10 del 189bp, del aa 280-342 not conserved |        |
|        | Full length                                   |                         |                           |               |                     |                   |                |                    | 3749               | 0.53       | 0.99             | 0.00 | >10.00                |                                              |        |
| RAD51C | c.1026+5delGTA CF4694                         | chr17:56,809,910del3    | 8                         | 5 1569        | Donor               | 0.77 > 0.00       | 1.98 > -6.29   | -                  | P/LP               |            |                  |      |                       |                                              | 5      |
|        | Skip exon 8                                   |                         |                           |               |                     |                   |                |                    | 3524               | 0.42       | 0.00             | 0.00 | >10.00                | 0.84 del 61bp, 1029 stop                     |        |
|        | Skip exons 7+8                                |                         |                           |               |                     |                   |                |                    | 454                | 0.05       | 0.02             | 0.01 | >10.00                | 0.08 del 122bp, 306 stop                     |        |
|        | Full length                                   |                         |                           |               |                     |                   |                |                    | 4372               | 0.52       | 0.98             | 0.01 | >10.00                |                                              |        |

**Table S6. cBROCA analysis of exonic mutations**

| Event                                                   | Transcript                     | Genomic position<br>(hg19) | exon | Distance<br>to splice | ClinVar  | cBROCA read depths |           |                  |                  | cBROCA interpretation |                           | S6<br>Ref |                           |
|---------------------------------------------------------|--------------------------------|----------------------------|------|-----------------------|----------|--------------------|-----------|------------------|------------------|-----------------------|---------------------------|-----------|---------------------------|
|                                                         |                                |                            |      |                       |          | Case               |           | Controls (N=374) |                  | Case vs Control       |                           |           |                           |
|                                                         |                                |                            |      |                       |          | Reads              | Fraction  | mean<br>fraction | s.d.<br>fraction | Z score               | PM Result                 |           |                           |
| BRCA1 c.5072C>T, p.T1691I<br>CF1380.01,02; CF1555.01,02 | Skip exon 17                   | chr17:41,219,627G>A        | 17   | E 85 3                | LP       | 1409+70            | 0.31+0.01 | 0.04             | 0.02             | >10.00                | 0.60 del 88bp, 1672 stop  | 1         |                           |
|                                                         | Full length                    |                            |      |                       |          | 3029+347           | 0.69+0.01 | 0.96             | 0.02             | >10.00                |                           |           |                           |
|                                                         |                                |                            |      |                       |          |                    |           |                  |                  |                       |                           |           |                           |
| BRCA1 c.5022C>T, p.I1674I<br>CF4469                     | Skip exon 17                   | chr17:41,219,677G>A        | 17   | E 36 52               | LB       | 371                | 0.18      | 0.04             | 0.02             | 6.73                  | 0.32 del 88bp, 1672 stop  |           |                           |
|                                                         | Full length                    |                            |      |                       |          | 1677               | 0.82      | 0.96             | 0.02             | 6.73                  |                           |           |                           |
|                                                         |                                |                            |      |                       |          |                    |           |                  |                  |                       |                           |           |                           |
| BRCA1 c.4992C>T, p.L1664L<br>CF832.01,.02               | Skip exon 17                   | chr17:41,219,707G>A        | 17   | E 5 83                | B/LB     | 420+47             | 0.14+0.01 | 0.04             | 0.02             | 5.00                  | 0.26 del 88bp, 1672 stop  |           |                           |
|                                                         | Full length                    |                            |      |                       |          | 2594+44            | 0.86+0.01 | 0.96             | 0.02             |                       |                           |           |                           |
|                                                         |                                |                            |      |                       |          |                    |           |                  |                  |                       |                           |           |                           |
| BRCA2 c.7992T>A, p.I2664I<br>CF4561                     | Skip exon 18                   | chr13:32,937,331T>A        | 18   | E 16 340              | LB/VUS   | 1220               | 0.22      | 0.01             | 0.01             | >10.00                | 0.43 del 355bp, 2702 stop |           |                           |
|                                                         | Skip exons 17+18               |                            |      |                       |          | 223                | 0.04      | 0.02             | 0.01             | 3.15                  |                           |           | 0.06 del 526bp, 2645 stop |
|                                                         | Full length                    |                            |      |                       |          | 4160               | 0.74      | 0.97             | 0.01             | >10.00                |                           |           |                           |
| BRCA2 c.8009C>T, p.S2670L<br>CF1106                     | Skip exon 18                   | chr13:32,937,348C>T        | 18   | E 33 323              | VUS/LP/P | 759                | 0.26      | 0.01             | 0.01             | >10.00                | 0.51 del 355bp, 2702 stop |           |                           |
|                                                         | Skip exons 17+18               |                            |      |                       |          | 139                | 0.05      | 0.02             | 0.01             | 4.25                  |                           |           | 0.08 del 526bp, 2645 stop |
|                                                         | Full length                    |                            |      |                       |          | 2029               | 0.69      | 0.97             | 0.01             | >10.00                |                           |           |                           |
| BRCA2 c.7802A>G, p.Y2601C<br>CF4683                     | Cryptic splice at c.7802       | chr13:32,932,063A>G        | 16   | E 185 4               | VUS      | 641                | 0.25      | 0.00             | 0.00             | >10.00                | 0.50 del 4 bp, 2646 stop  | 3         |                           |
|                                                         | Full length                    |                            |      |                       |          | 1905               | 0.75      | 1.00             | 0.00             | >10.00                |                           |           |                           |
|                                                         |                                |                            |      |                       |          |                    |           |                  |                  |                       |                           |           |                           |
| BRIP1 c.82A>G, p.M28V<br>CF4211                         | Skip exon 2                    | chr17:59,938,819T>C        | 2    | E 112 12              | VUS/LP   | 111                | 0.22      | 0.01             | 0.01             | >10.00                | 0.43 loss of first ATG    |           |                           |
|                                                         | Alternate splice 5' UTR        |                            |      |                       |          | 129                | 0.26      | 0.33             | 0.03             | 2.28                  |                           |           | ns                        |
|                                                         | Full length                    |                            |      |                       |          | 258                | 0.52      | 0.66             | 0.03             | 4.59                  |                           |           |                           |
| PALB2 c.2559C>T, p.G853G<br>CF1534                      | Cryptic donor exon 6 at c.2558 | chr16:23,640,552G>A        | 6    | E 45 28               | VUS      | 1077               | 0.49      | 0.00             | 0.00             | >10.00                | 0.98 del 29bp, 873 stop   | 2         |                           |
|                                                         | Full length                    |                            |      |                       |          | 1130               | 0.51      | 1.00             | 0.00             | >10.00                |                           |           |                           |
|                                                         |                                |                            |      |                       |          |                    |           |                  |                  |                       |                           |           |                           |

**Table S7. Transcriptional effects of genomic copy number mutations**

| Event                         | Transcript                                            | genomic coordinates (hg19)  | cBROCA result         |
|-------------------------------|-------------------------------------------------------|-----------------------------|-----------------------|
| BRCA2 exons 14-24 triplicated | CF1815, CF4541, CF4748, CF4755                        | chr13:32,927,735-32,958,445 |                       |
|                               | 3 tandem repeats of exons 14-24                       |                             | ins 4498bp, 3116 stop |
|                               | 3 tandem repeats of exons 14-24 + intron 24 insertion |                             | ins 4776bp, 3098 stop |
| BRCA2 del exon 1              | CF4727                                                | chr13:32,889,493-32,890,429 |                       |
|                               | promoter deletion, <i>de novo</i>                     |                             | loss of transcript    |

**Table S8. Mutations evaluated by cBROCA**

| Gene  | Genotype            | Position hg19     | Table |
|-------|---------------------|-------------------|-------|
| APC   | c.532(-1000)delGT   | chr5:112,115,487  | S5    |
| ATM   | c.-30-1G>T          | chr11:108,098,321 | S4    |
| ATM   | c.901G>A; G301S     | chr11:108,115,753 | S2    |
| ATM   | c.1009C>T, p.R337C  | chr11:108,117,798 | S3    |
| ATM   | c.2250G>A; p.K750K  | chr11:108,127,067 | S2    |
| ATM   | c.2638+2T>C         | chr11:108,138,071 | S2    |
| ATM   | c.3154-1G>A         | chr11:108,143,448 | S4    |
| ATM   | c.3963G>A, p.M1321I | chr11:108,155,170 | S3    |
| ATM   | c.5007-3T>A         | chr11:108,170,438 | S5    |
| ATM   | c.5009C>T, p.A1670V | chr11:108,170,444 | S3    |
| ATM   | c.5497-2A>C         | chr11:108,175,400 | S2    |
| ATM   | c.5674+1G>T         | chr11:108,175,580 | S4    |
| ATM   | c.5821G>C, p.V1941L | chr11:108,180,945 | S3    |
| ATM   | c.6976-2A>C         | chr11:108,198,370 | S2    |
| ATM   | c.7089+1del38       | chr11:108,198,484 | S2    |
| ATM   | c.7181C>T, p.S2394L | chr11:108,199,839 | S3    |
| ATM   | c.7629+2T>C         | chr11:108,202,286 | S4    |
| ATM   | c.8418+1delGTGA     | chr11:108,214,099 | S2    |
| ATM   | c.8787-13G>T        | chr11:108,225,525 | S5    |
| ATM   | c.8988-1G>A         | chr11:108,236,051 | S2    |
| BARD1 | c.159-1G>T          | chr2:215,661,842  | S4    |
| BARD1 | c.1569-12T>G        | chr2:215,617,291  | S5    |
| BRCA1 | c.75C>T, p.P25P     | chr17:41,276,039  | S3    |
| BRCA1 | c.81T>C, p.C27C     | chr17:41,267,96   | S3    |
| BRCA1 | c.81-6T>C           | chr17:41,267,802  | S3    |
| BRCA1 | c.135-20T>G         | chr17:41,258,570  | S3    |
| BRCA1 | c.190G>T, p.D67Y    | chr17:41,258,486  | S3    |
| BRCA1 | c.212+1G>A          | chr17:41,258,472  | S4    |
| BRCA1 | c.301+55G>A         | chr17:41,256,830  | S3    |
| BRCA1 | c.594-2A>C          | chr17:41,247,941  | S4    |
| BRCA1 | c.4185+1insAdel21   | chr17:41,242,939  | S4    |
| BRCA1 | c.4185+37delITG     | chr17:41,242,923  | S3    |
| BRCA1 | c.4357+518delAAAG   | chr17:41,233,900  | S3    |
| BRCA1 | c.4484G>T; p.R1495M | chr17:41,228,505  | S2    |
| BRCA1 | c.4485-1G>A         | chr17:41,226,539  | S4    |
| BRCA1 | c.4986+3G>C         | chr17:41,222,942  | S5    |
| BRCA1 | c.4992C>T, p.L1664L | chr17:41,219,707  | S6    |
| BRCA1 | c.5022C>T, p.I1674I | chr17:41,219,677  | S6    |
| BRCA1 | c.5072C>T, p.T1691I | chr17:41,219,627  | S6    |
| BRCA1 | c.5074+1158C>T      | chr17:41,218,467  | S3    |
| BRCA1 | c.5097G>A, p.R1699R | chr17:41,215,946  | S3    |
| BRCA1 | c.5194-12G>A        | chr17:41,209,164  | S5    |
| BRCA1 | c.5207T>G, p.V1736G | chr17:41,209,139  | S3    |
| BRCA1 | c.5277+1G>A         | chr17:41,209,068  | S4    |
| BRCA1 | c.5278(-1519)T>C    | chr17:41,204,653  | S3    |
| BRCA1 | c.5406+4delAGTA     | chr17:41,201,131  | S5    |

| Gene  | Genotype                | Position hg19                   | Table |
|-------|-------------------------|---------------------------------|-------|
| BRCA1 | c.5454C>T, p.D1818D     | chr17:41,199,673                | S3    |
| BRCA1 | c.5468-1G>A             | chr17:41,197,820                | S2    |
| BRCA2 | del exon 1              | chr13:32,889,493-32,890,429del  | S7    |
| BRCA2 | c.28A>G, p.T10A         | chr13:32,890,624                | S3    |
| BRCA2 | c.128A>G, p.N43S        | chr13:32,893,274                | S3    |
| BRCA2 | c.426(-252)G>A          | chr13:32,899,986                | S3    |
| BRCA2 | c.517-2A>G              | chr13:32,900,634                | S2    |
| BRCA2 | c.750G>A, p.V250V       | chr13:32,905,124                | S3    |
| BRCA2 | c.7007G>C, p.R2336P     | chr13:32,921,033                | S4    |
| BRCA2 | c.7007+1G>C             | chr13:32,921,034                | S4    |
| BRCA2 | c.7007+5G>A             | chr13:32,921,038                | S5    |
| BRCA2 | exons 14-24 triplicated | chr13:32,927,735-32,958,445trip | S7    |
| BRCA2 | c.7466A>G, p.D2489G     | chr13:32,930,595                | S3    |
| BRCA2 | c.7559G>C, p.R2520P     | chr13:32,930,688                | S3    |
| BRCA2 | c.7618-1G>A             | chr13:32,931,878                | S2    |
| BRCA2 | c.7802A>G, p.Y2601C     | chr13:32,932,063                | S6    |
| BRCA2 | c.7820C>T, p.T2607I     | chr13:32,936,674                | S3    |
| BRCA2 | c.7879A>T, p.I2627F     | chr13:32,936,733                | S3    |
| BRCA2 | c.7902G>A, p.M2634I     | chr13:32,936,756                | S3    |
| BRCA2 | c.7976G>A, p.R2659K     | chr13:32,936,830                | S4    |
| BRCA2 | c.7976+2C>G             | chr13:32,936,832                | S4    |
| BRCA2 | c.7992T>A, p.I2664I     | chr13:32,937,331                | S6    |
| BRCA2 | c.8009C>T, p.S2670L     | chr13:32,937,348                | S6    |
| BRCA2 | c.8206C>T, p.L2736F     | chr13:32,937,545                | S3    |
| BRCA2 | c.8285C>G, p.P2762R     | chr13:32,937,624                | S3    |
| BRCA2 | c.8331+3A>C             | chr13:32,937,673                | S5    |
| BRCA2 | c.8350C>T, p.R2784W     | chr13:32,944,557                | S3    |
| BRCA2 | c.8359C>T, p.R2787C     | chr13:32,944,566                | S3    |
| BRCA2 | c.8510G>T, p.G2837V     | chr13:32,945,115                | S3    |
| BRCA2 | c.9076C>G, p.Q3026E     | chr13:32,954,009                | S3    |
| BRCA2 | c.9117G>A, p.P3039P     | chr13:32,954,050                | S2    |
| BRCA2 | c.9344A>G, p.K3115R     | chr13:32,968,913                | S3    |
| BRCA2 | c.9648(+127)G>A         | chr13:32,971,308                | S3    |
| BRIP1 | c.82A>G, p.M28V         | chr17:59,938,819                | S6    |
| BRIP1 | c.93+1G>A               | chr17:59,938,807                | S2    |
| BRIP1 | c.93+1G>A               | chr17:59,938,807                | S4    |
| BRIP1 | c.297C>T, p.D99D        | chr17:59,934,501                | S3    |
| BRIP1 | c.626A>G, p.K209R       | chr17:59,924,463                | S4    |
| BRIP1 | c.2372A>T, p.D791V      | chr17:59,820,381                | S3    |
| BRIP1 | c.2309A>G, p.K797R      | chr17:59,793,414                | S3    |
| BRIP1 | c.2765T>C, p.L922S      | chr17:59,763,337                | S3    |
| CDH1  | c.1565+1G>A             | chr16:68,849,663                | S2    |
| CDH1  | c.1565+1G>A             | chr16:68,849,663                | S4    |
| CDH1  | c.1711G>A; G571S        | chr16:68,853,328                | S2    |
| CDH1  | c.2296-670T>A           | chr16:68,862,887                | S3    |
| CDH1  | c.2440-6C>G             | chr16:68,867,187                | S3    |
| CHEK2 | c.246-260del15          | chr22:29,130,450-29,130,464del  | S3    |
| CHEK2 | c.320-5T>A              | chr22:29,121,360                | S5    |

| Gene   | Genotype            | Position hg19    | Table |
|--------|---------------------|------------------|-------|
| CHEK2  | c.444+1G>A          | chr22:29,121,230 | S2    |
| CHEK2  | c.592+3A>T          | chr22:29,120,962 | S5    |
| CHEK2  | c.846+4delAGTA      | chr22:29,105,987 | S5    |
| CHEK2  | c.1130A>G, p.E377G  | chr22:29,091,827 | S3    |
| GEN1   | c.1072-185G>A       | chr2:17,955,353  | S3    |
| MLH1   | c.678-481C>T        | chr3:37,055,442  | S3    |
| MLH1   | c.1732-264A>T       | chr3:37,088,746  | S5    |
| MSH2   | c.2635-24A>G        | chr2:47,709,894  | S5    |
| PALB2  | c.46A>G, p.K16E     | chr16:23,652,433 | S3    |
| PALB2  | c.1551A>G, p.K517K  | chr16:23,646,316 | S3    |
| PALB2  | c.1699C>T, p.H567T  | chr16:23,641,776 | S3    |
| PALB2  | c.2204C>T, p.P735L  | chr16:23,641,271 | S3    |
| PALB2  | c.2289G>C, p.L763F  | chr16:23,641,186 | S3    |
| PALB2  | c.2515-1G>T         | chr16:23,640,597 | S2    |
| PALB2  | c.2559C>T, p.G853G  | chr16:23,640,552 | S6    |
| PALB2  | c.2587-703G>A       | chr16:23,638,421 | S3    |
| PALB2  | c.2752C>T, p.P918S  | chr16:23,635,412 | S3    |
| PALB2  | c.2835-1G>C         | chr16:23,634,452 | S2    |
| PALB2  | c.2835-1G>C         | chr16:23,634,452 | S4    |
| PALB2  | c.3113G>A, p.W1038X | chr16:23,632,683 | S4    |
| PTEN   | c.79+4229A>T        | chr10:89,628,534 | S3    |
| PTEN   | c.79+11548A>G       | chr10:89,638,942 | S3    |
| PTEN   | c.210-7del5         | chr10:89,690,796 | S5    |
| PTEN   | c.492+7414A>G       | chr10:89,700,422 | S3    |
| RAD51C | c.904+5G>T          | chr17:56,798,178 | S5    |
| RAD51C | c.1026+5delGTA      | chr17:56,809,910 | S5    |
| RAD51D | c.904-2A>T          | chr17:33,428,057 | S2    |
| RAD51D | c.904-3C>T          | chr17:33,428,059 | S3    |
| TP53   | c.786(-60)G>A       | chr17:7,577,215  | S3    |

## References for supplementary tables

### Table S4

1. Friedman LS, Szabo CI, Ostermeyer EA, Dowd P, Butler L, Park T, Lee MK, Goode EL, Rowell SE, King MC (1995) Novel inherited mutations and variable expressivity of *BRCA1* alleles, including the founder mutation 185delAG in Ashkenazi Jewish families. *Am J Hum Genet.* 57:1284-1297.
2. de la Hoya M, Soukarieh O, López-Perolio I, et al. (2016) Combined genetic and splicing analysis of *BRCA1* c.[594-2A>C; 641A>G] highlights the relevance of naturally occurring in-frame transcripts for developing disease gene variant classification algorithms. *Hum Mol Genet* 25:2256-2268.
3. Meyer P, Voigtlaender T, Bartram CR, Klaes R (2003) Twenty-three novel *BRCA1* and *BRCA2* sequence alterations in breast and/or ovarian cancer families in Southern Germany. *Hum Mutat.* 22:259.
4. Tesoriero AA, Wong EM, Jenkins MA, Hopper JL, Brown MA, Chenevix-Trench G, Spurdle AB, Southey MC; kConFab (2005) Molecular characterization and cancer risk associated with *BRCA1* and *BRCA2* splice site variants identified in multiple-case breast cancer families. *Hum Mutat.* 26:495.
5. Serova-Sinilnikova OM, Boutrand L, Stoppa-Lyonnet D, Bressac-de-Paillerets B, Dubois V, Lasset C, Janin N, Bignon YJ, Longy M, Maugard C, Lidereau R, Leroux D, Frebourg T, Mazoyer S, Lenoir GM (1997) *BRCA2* mutations in hereditary breast and ovarian cancer in France. *Am J Hum Genet* 60:1236-1239.
6. Hofmann W, Horn D, Hüttner C, Classen E, Scherneck S (2003) The *BRCA2* variant 8204G>A is a splicing mutation and results in an in-frame deletion of the gene. *J Med Genet* 40:e23.
7. Shirts BH, Casadei S, Jacobson AL, Lee MK, Gulsuner S, Bennett RL, Miller M, Hall SA, Hampel H, Hisama FM, Naylor LV, Goetsch C, Leppig K, Tait JF, Scroggins SM, Turner EH, Livingston R, Salipante SJ, King MC, Walsh T, Pritchard CC (2016) Improving performance of multigene panels for genomic analysis of cancer predisposition. *Genet Med.* :974-981.
8. Casadei S, Norquist BM, Walsh T, Stray S, Mandell JB, Lee MK, Stamatoyannopoulos JA, King MC (2011) Contribution of inherited mutations in the *BRCA2*-interacting protein *PALB2* to familial breast cancer. *Cancer Res.* 71:2222-2229.

### Table S5

1. Wappenschmidt B, Becker AA, Hauke J, Weber U, Engert S, Köhler J, Kast K, Arnold N, Rhiem K, Hahnen E, Meindl A, Schmutzler RK (2012) Analysis of 30 putative *BRCA1* splicing mutations in hereditary breast and ovarian cancer families identifies exonic splice site mutations that escape *in silico* prediction. *PLoS One* 7:e50800.
2. Whiley PJ, Guidugli L, Walker LC, Healey S, Thompson BA, Lakhani SR, Da Silva LM; kConFab Investigators, Tavtigian SV, Goldgar DE, Brown MA, Couch FJ, Spurdle AB. (2011) Splicing and multifactorial analysis of intronic *BRCA1* and *BRCA2* sequence variants

identifies clinically significant splicing aberrations up to 12 nucleotides from the intron/exon boundary. *Hum Mutat* 32:678-687

3. Kraus C, Hoyer J, Vasileiou G, Wunderle M, Lux MP, Fasching PA, Krumbiegel M, Uebe S, Reuter M, Beckmann MW, Reis A (2017) Gene panel sequencing in familial breast/ovarian cancer patients identifies multiple novel mutations also in genes others than *BRCA1/2*. *Int J Cancer* 140:95-102.

4. Meindl A, Hellebrand H, Wiek C, Erven V, Wappenschmidt B, Niederacher D, Freund M, Lichtner P, Hartmann L, Schaal H, Ramser J, Honisch E, Kubisch C, Wichmann HE, Kast K, Deissler H, Engel C, Müller-Myhsok B, Neveling K, Kiechle M, Mathew CG, Schindler D, Schmutzler RK, Hanenberg H. (2010) Germline mutations in breast and ovarian cancer pedigrees establish *RAD51C* as a human cancer susceptibility gene. *Nat Genet* 42:410-414.

5. Golmard L, Caux-Moncoutier V, Davy G, Al Ageeli E, Poirot B, Tirapo C, Michaux D, Barbaroux C, d'Enghien CD, Nicolas A, Castéra L, Sastre-Garau X, Stern MH, Houdayer C, Stoppa-Lyonnet D (2013) Germline mutation in the *RAD51B* gene confers predisposition to breast cancer. *BMC Cancer* 13:484.

6. Brown LT, Sexsmith E, Malkin D. (2000) Identification of a novel *PTEN* intronic deletion in Li-Fraumeni syndrome and its effect on RNA processing. *Cancer Genet Cytogenet.* 123:65-68.

#### **Table S6**

1. Ahlborn LB, Dandanell M, Steffensen AY, Jønson L, Nielsen FC, Hansen TV. (2015) Splicing analysis of 14 *BRCA1* missense variants classifies nine variants as pathogenic. *Breast Cancer Res Treat.* 150:289-298

2. Casadei S, Norquist BM, Walsh T, Stray S, Mandell JB, Lee MK, Stamatoyannopoulos JA, King MC. (2011) Contribution of inherited mutations in the BRCA2-interacting protein PALB2 to familial breast cancer. *Cancer Res.* 71:2222-2229.

3. Degrolard-Courcet E, Sokolowska J, Padeano MM, Guiu S, Bronner M, Chery C, Coron F, Lepage C, Chapusot C, Loustalot C, Jouve JL, Hatem C, Ferrant E, Martin L, Coutant C, Baurand A, Couillault G, Delignette A, El Chehadeh S, Lizard S, Arnould L, Fumoleau P, Callier P, Mugneret F, Philippe C, Frebourg T, Jonveaux P, Faivre L (2014) Development of primary early-onset colorectal cancers due to biallelic mutations of the *FANCD1/BRCA2* gene. *Eur J Hum Genet.* 22:979-987.
